# Supplementary material
Source: publisher site journal article supplement (https://www.dovepress.com/article/359968)
Supplement: Supplementary file 1 [file get_supplementary_file.php]

Table S1. Univariate and multivariate analysis of overall survival in the validation cohort.

| Variables | Univariate analysis | | | Multivariate analysis | |
| --- | --- | --- | --- | --- | --- |
| HR (95% CI) | *P*-value | HR (95% CI) | | *P*-value |
| Age (years) | 1.013 (0.912-1.187) | 0.456 |  | |  |
| BMI (kg/m2) | 1.002 (0.796-1.317) | 0.361 |  | |  |
| Menopausal status (%) |  |  |  | |  |
| Pre/peri-menopause | Reference | **-** |  | |  |
| Post-menopause | 0.991 (0.513-1.413) | 0.567 |  | |  |
| Fertility history (%) |  |  |  | |  |
| 0 | Reference | - |  | |  |
| 1 | 1.003 (0.896-1.193) | 0.168 |  | |  |
| ≥2 | 1.001 (0.784-1.463) | 0.538 |  | |  |
| Comorbidities (%) |  |  |  | |  |
| Yes | Reference | **-** |  | |  |
| No | 1.031 (0.708-1.349) | 0.589 |  | |  |
| Neutrophil (/μL) | 1.543 (1.346-1.748) | **0.001** | 1.471 (1.275-1.548) | | **0.008** |
| Platelet (x103/mL) | 1.014 (0.918-1.156) | 0.279 |  | |  |
| Tumor size (cm) | 1.368 (1.198-1.597) | **0.005** | 1.287 (1.008-1.473) | | **0.015** |
| Pathological grade (%) |  |  |  | |  |
| G1-2 | Reference | - |  | |  |
| G3 | 0.896 (0.645-1.079) | 0.492 |  | |  |
| FIGO stage (%) |  |  |  | |  |
| Early (I–II) | Reference | - | Reference | | - |
| Advanced (III–IV) | 1.667 (1.375-2.089) | **<0.001** | 1.457 (1.209-1.935) | | **0.001** |
| Histological type (%) |  |  |  | |  |
| Serous | Reference | - |  | |  |
| Mucinous | 0.997 (0.807-1.231) | 0.769 |  | |  |
| Endometrioid | 0.907 (0.797-1.114) | 0.278 |  | |  |
| Others | 1.001 (0.902-1.197) | 0.164 |  | |  |
| Lymphatic metastasis (%) |  |  |  | |  |
| Negative | Reference | - | Reference | | - |
| Positive | 1.564 (1.314-1.963) | **0.001** | 1.408 (1.285-1.742) | | **0.005** |
| CALLY index |  |  |  | |  |
| CALLY <3 | Reference | - | Reference | | - |
| CALLY ≥3 | 0.507 (0.307-0.739) | **<0.001** | 0.605 (0.403-0.854) | | **<0.001** |

The bold values denote *P*-value less than 0.05 with statistical significance. Abbreviations: CI=confidence interval; HR= hazard ratio; BMI, Body Mass Index; FIGO, International Federation of Gynecology and Obstetrics.

Table S2. Univariate and multivariate analysis of recurrence-free survival in the validation cohort.

| Variables | Univariate analysis | | | Multivariate analysis | |
| --- | --- | --- | --- | --- | --- |
| HR (95% CI) | *P*-value | HR (95% CI) | | *P*-value |
| Age (years) | 1.002 (0.813-1.197) | 0.167 |  | |  |
| BMI (kg/m2) | 0.995 (0.813-1.203) | 0.156 |  | |  |
| Menopausal status (%) |  |  |  | |  |
| Pre/peri-menopause | Reference | **-** |  | |  |
| Post-menopause | 0.956 (0.697-1.305) | 0.789 |  | |  |
| Fertility history (%) |  |  |  | |  |
| 0 | Reference | - |  | |  |
| 1 | 1.004 (0.889-1.236) | 0.462 |  | |  |
| ≥2 | 0.976 (0.846-1.217) | 0.451 |  | |  |
| Comorbidities (%) |  |  |  | |  |
| Yes | Reference | **-** |  | |  |
| No | 1.001 (0.708-1.279) | 0.638 |  | |  |
| Neutrophil (/μL) | 1.274 (1.117-1.496) | **0.025** | 1.142 (0.913-1.385) | | 0.145 |
| Platelet (x103/mL) | 1.001 (0.901-1.019) | 0.634 |  | |  |
| Tumor size (cm) | 1.307 (1.117-1.637) | **0.030** | 1.208 (0.914-1.463) | | 0.214 |
| Pathological grade (%) |  |  |  | |  |
| G1-2 | Reference | - |  | |  |
| G3 | 0.889 (0.645-1.368) | 0.429 |  | |  |
| FIGO stage (%) |  |  |  | |  |
| Early (I–II) | Reference | - | Reference | | - |
| Advanced (III–IV) | 1.668 (1.452-2.007) | **<0.001** | 1.586 (1.236-1.956) | | **0.001** |
| Histological type (%) |  |  |  | |  |
| Serous | Reference | - |  | |  |
| Mucinous | 0.997 (0.814-1.245) | 0.638 |  | |  |
| Endometrioid | 0.908 (0.854-1.107) | 0.489 |  | |  |
| Others | 1.005 (0.910-1.197) | 0.312 |  | |  |
| Lymphatic metastasis (%) |  |  |  | |  |
| Negative | Reference | - | Reference | | - |
| Positive | 1.486 (1.364-1.846) | **0.001** | 1.354 (1.175-1.607) | | **0.002** |
| CALLY index |  |  |  | |  |
| CALLY <3 | Reference | - | Reference | | - |
| CALLY ≥3 | 0.525 (0.318-0.723) | **<0.001** | 0.564 (0.346-0.766) | | **<0.001** |

The bold values denote *P*-value less than 0.05 with statistical significance. Abbreviations: CI=confidence interval; HR= hazard ratio; BMI, Body Mass Index; FIGO, International Federation of Gynecology and Obstetrics.
